# Supplementary material for: Sulfur/polyacrylonitrile/carbon multi-composites as cathode materials for lithium/sulfur battery in the concentrated electrolyte
Source: Royal Society of Chemistry journal article supplement (doi:10.1039/c3ta14914e), 2014-01-01
Supplement: c3ta14914e.pdf [file c3ta14914e.pdf]

## Sulfur/polyacrylonitrile/carbon multi-composites as cathode materials for lithium/sulfur battery in the concentrated electrolyte

Y. Z. Zhang, S. Liu, G. C. Li, G. R. Li, X. P. Gao

Institute of New Energy Material Chemistry, Nankai University, Tianjin, China

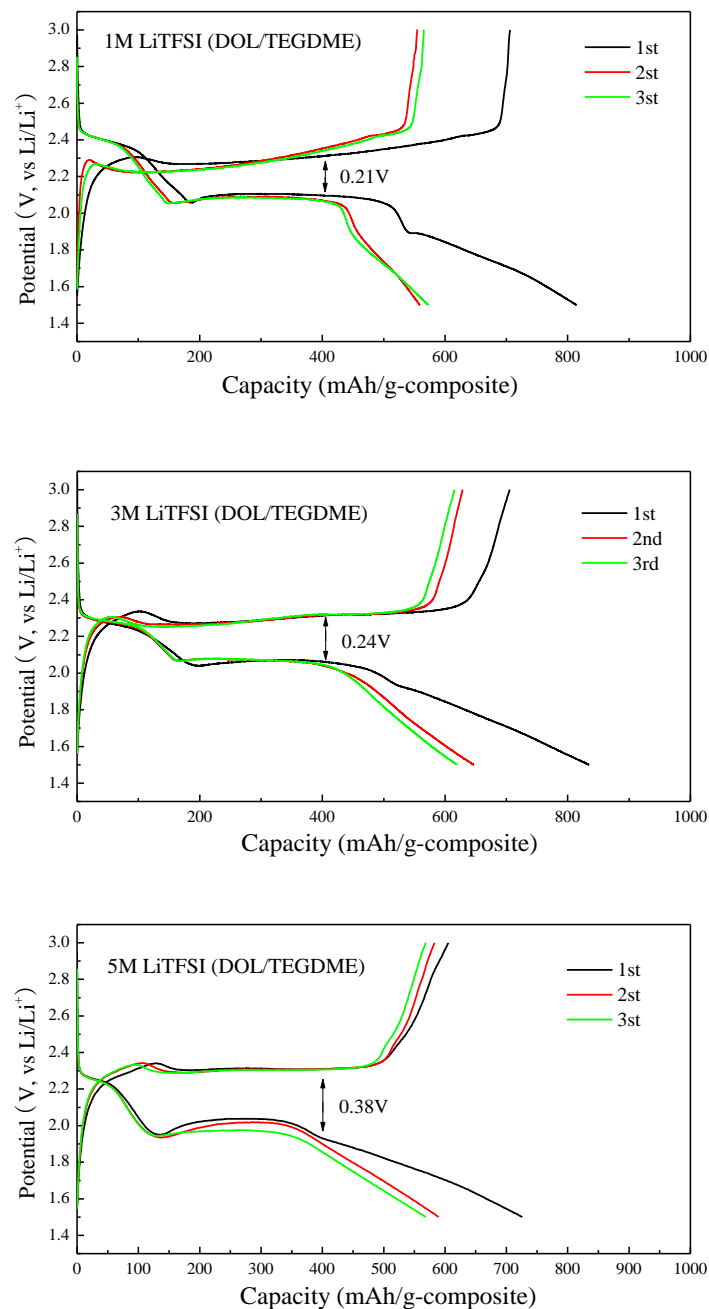

**Fig. S1.** The initial charge–discharge curves of the composite with 51 wt % S at 100 mA g<sup>-1</sup> in the electrolyte with 1 M LiTFSI, 3 M LiTFSI, and 5 M LiTFSI in DOL/TEGDME.

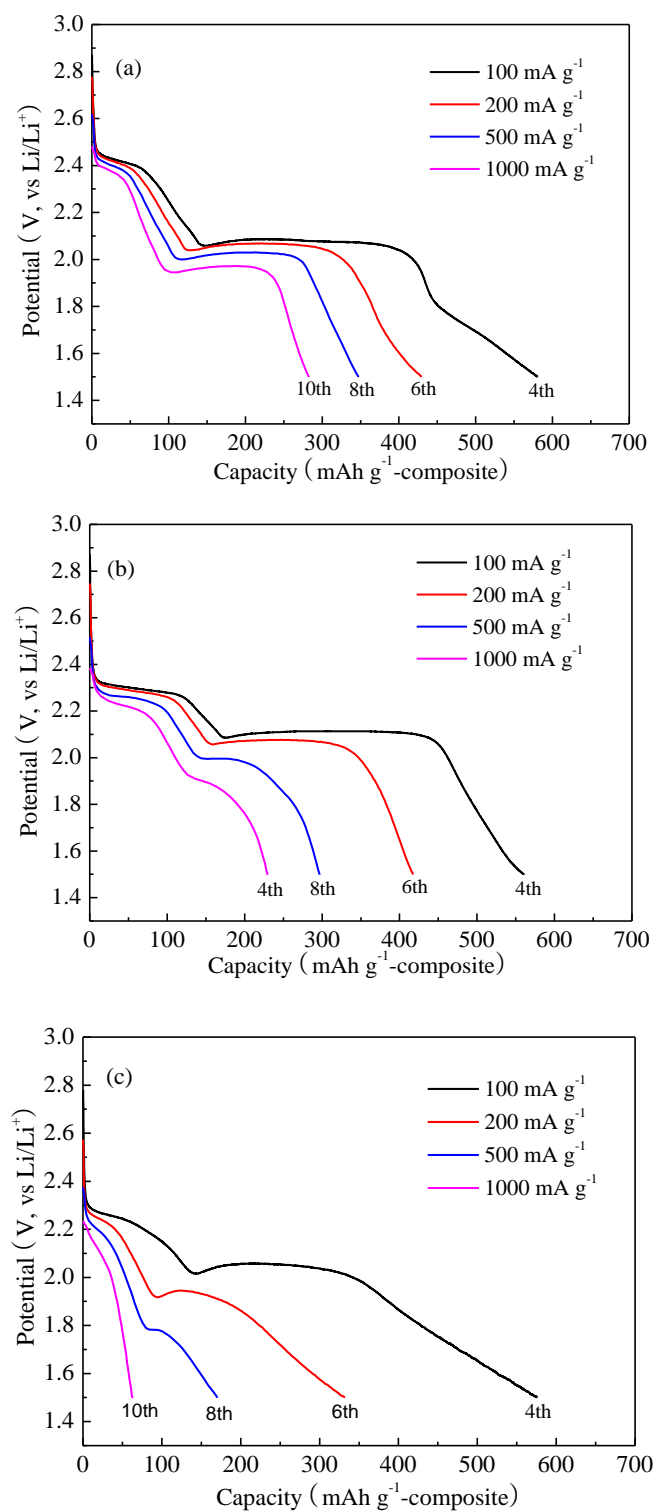

**Fig. S2.** The discharge curves of the composite with 51 wt % S at the different current densities in the electrolyte with 1 M LiTFSI (a), 3 M LiTFSI (b), and 5 M LiTFSI (c) in DOL/TEGDME.
